# Supplementary material
Source: ML conference proceedings conference paper supplement (https://openaccess.thecvf.com/content/CVPR2026/html/Abousamra_TopoSlide_Topologically-Informed_Histopathology_CVPR_2026_paper.html)
Supplement: Supplementary file 1 [file Abousamra_TopoSlide_Topologically-Informed_Histopathology_CVPR_2026_supplemental.pdf]

# TopoSlide: Topologically-Informed Histopathology Whole Slide Image Representation Learning

## – Supplemental Material –

Shahira Abousamra    Asmita Sood    Sylvia Plevritis  
Stanford University, Department of Biomedical Data Science, USA  
{sabousamra, asmitas, plevriti}@stanford.edu

### A. Implementation Details

TopoSlide is a vision transformer (ViT) [1] configured with 8 layers and 12 multihead attention blocks. It is initialized with weights from timm [2] off-the-shelf pretrained ViT using Momentum Contrast (MoCo) self-supervised learning [3]. The weights assigned to the different components of the loss function are as follows:  $\lambda_1$  and  $\lambda_2$  in  $\mathcal{L}_{cond-topo}$  (Eq. 1) are set to 0.5,  $\lambda_3$  and  $\lambda_4$  in  $\mathcal{L}_{local-topo}$  (Eq. 2) are set to 1 and 0.5, respectively, and  $\lambda_5$  assigned to  $\mathcal{L}_{contrast}$  is set to 0.25. AdamW [4] optimizer is used with cosine annealing learning rate scheduler. A warm-up learning rate of 0.01 is used for 5 epochs, then the learning rate is set to 0.001. During training, data augmentation is performed by random sampling of varying-size regions-of-interest (ROIs) from the tissue area with a maximum size of  $100 \times 100$  patches, where the patch size is  $512 \times 512$  at 20x magnification. For the loss  $\mathcal{L}_{cond-topo}$ , 4 patches are randomly sampled from each patch cluster that spans greater than 10% of the slide, in addition to one other patch cluster that has a lower proportion to act as negative sampling. The patch embeddings are used as conditional input to predict the topology and proportion of their respective patch clusters. The persistence diagram for each topological dimension is vectorized into a histogram of persistence to make it more interpretable by the machine learning model. The histogram is binned and normalized using statistics from the training dataset: the normalization is done by dividing each bin by the maximum number of components falling in that bin from within a WSI in the training set.

### B. Ablation Study on the Components of the Loss Function

First, we evaluate the contribution of the topological loss. We train the model with only the cluster proportions and the contrastive loss and leave out any topology-based loss terms. The results in Tab. B.1 on the task of the predominant tumor histology retrieval show a big drop in performance

when excluding the topology-based loss terms.

Second, we evaluate the contribution of the local topology loss and the contrastive loss when added to the main conditional topological loss. We train TopoSlide on the TCGA-LUAD dataset with different combinations of the loss components and evaluate on the predominant histology retrieval task using the DHMC-LUAD dataset [5]. As shown in Tab. B.2, the performance varies across metrics depending on the combination of the loss components; however, the best overall performance is achieved when all three loss components are combined.

Table B.1. Ablation study on the contribution of the topological loss (Topo. Loss). TopoSlide trained with and without the topological loss terms is evaluated on WSI retrieval performance for DHMC histologic pattern classification. Reporting majority vote classification performance at  $K=1$  and  $K=5$ .

| Model                      | Training Dataset | K=1           |               | K=5           |               |
|----------------------------|------------------|---------------|---------------|---------------|---------------|
|                            |                  | Bal. Acc      | Macro F1      | Bal. Acc      | Macro F1      |
| TopoSlide (w/o Topo. Loss) | TCGA-LUAD        | 34.604        | 32.752        | 33.782        | 32.863        |
| TopoSlide                  | TCGA-LUAD        | <b>52.489</b> | <b>51.388</b> | <b>46.220</b> | <b>49.617</b> |

### C. Additional Experimental Details

Due to space limitation, the results for some of the experiments described in the main paper are presented here, as follows.

**BRCA Experiments** We apply the same experimental structure used for LUAD and train two versions of the model: TopoSlide(TCGA), trained with 50% of TCGA-BRCA (566 slides), and TopoSlide(CPTAC), trained on CPTAC-BRCA (650 slides) to maintain consistent scale with the TCGA-LUAD setting (536 slides). We evaluate performance on three BRCA tasks: histologic subtype retrieval, biomarker prediction with linear probing, and survival prediction using Cox proportional hazards models.

**LUAD Gene Mutation Labels Distribution.** We indicate the number of positive and negative cases for each label:

Table B.2. Ablation study of loss function, evaluated on whole slide retrieval for histologic pattern classification (C=5) on DHMC-LUAD using majority-vote (MV) prediction over top- $K$  retrieved neighbours. We report MV balanced accuracy and MV macro F-score for  $K \in \{1, 3, 5\}$ . Best performance is highlighted in bold, and the second-best is underlined.

| $\mathcal{L}_{cond-topo}$ | $\mathcal{L}_{local-topo}$ | $\mathcal{L}_{contrast}$ | <b>K=1</b>    |               | <b>K=3</b>    |               | <b>K=5</b>    |               |
|---------------------------|----------------------------|--------------------------|---------------|---------------|---------------|---------------|---------------|---------------|
|                           |                            |                          | MV Bal. Acc   | MV Macro F1   | MV Bal. Acc   | MV Macro F1   | MV Bal. Acc   | MV Macro F1   |
| ✓                         | ✗                          | ✗                        | <u>47.268</u> | <u>48.28</u>  | 35.155        | 35.859        | 35.833        | 36.61         |
| ✓                         | ✓                          | ✗                        | 45.046        | 45.929        | 37.652        | 38.126        | 40.506        | 41.463        |
| ✓                         | ✗                          | ✓                        | 37.714        | 37.835        | <b>42.549</b> | <b>45.165</b> | <u>41.033</u> | <u>43.255</u> |
| ✓                         | ✓                          | ✓                        | <b>52.489</b> | <b>51.388</b> | <u>40.150</u> | <u>42.574</u> | <b>46.220</b> | <b>49.617</b> |

Table C.1. Slide retrieval results for histologic subtype classification (C=2) on TCGA-BRCA using majority-vote (MV) prediction over top- $K$  retrieved neighbours. We report MV balanced accuracy and MV macro F-score for  $K \in \{1, 3, 5\}$ . Best performance in each model category is highlighted in bold, and the second best is underlined. \*\* and \* indicate the overall best and second-best, respectively. N/A means no slide encoder trained.

| Model         | Slide Encoder Pre-training |                 |            | <b>K=1</b>      |                 | <b>K=3</b>      |                 | <b>K=5</b>      |                 |
|---------------|----------------------------|-----------------|------------|-----------------|-----------------|-----------------|-----------------|-----------------|-----------------|
|               | Modalities                 | Dataset         | Data Scope | Bal. Acc        | Macro F1        | Bal. Acc        | Macro F1        | Bal. Acc        | Macro F1        |
| CONCH         | Mean Pool                  | N/A             | N/A        | <b>76.431</b>   | <b>75.489</b>   | <b>76.855</b>   | <b>77.922</b>   | <b>76.566</b>   | <b>78.320</b>   |
| Virchow       | Mean Pool                  | N/A             | N/A        | 61.819          | 62.058          | 59.709          | 61.100          | 57.175          | 58.308          |
| CTransPath    | Mean Pool                  | N/A             | N/A        | 64.989          | 65.698          | <u>66.918</u>   | <u>69.287</u>   | <u>66.136</u>   | <u>69.370</u>   |
| GigaPath-Tile | Mean Pool                  | N/A             | N/A        | <u>67.911</u>   | <u>68.427</u>   | 66.884          | 68.560          | 65.933          | 68.107          |
| TITAN         | VLM                        | Mass 340-K      | 20 organs  | <b>86.672**</b> | <b>86.230**</b> | <b>89.696**</b> | <b>88.215**</b> | <b>88.830**</b> | <b>87.904**</b> |
| PRISM         | VLM                        | MSKCC, ...      | 17 organs  | 82.047*         | 82.441*         | <u>86.246*</u>  | <u>85.240*</u>  | <u>87.784*</u>  | <u>86.302*</u>  |
| CHIEF         | VLM                        | DFCI, TCGA, ... | 19 organs  | 75.469          | 75.110          | 79.109          | 79.649          | 83.009          | 82.676          |
| GigaPath      | Vision                     | Providence      | 31 organs  | 65.667          | 66.640          | 64.917          | 67.267          | 63.753          | 66.279          |
| TITAN-V       | Vision                     | CPTAC-BRCA      | BRCA       | <u>76.792</u>   | <u>77.456</u>   | <u>79.333</u>   | 80.5            | 80.988          | <u>82.357</u>   |
| GigaPath      | Vision                     | CPTAC-BRCA      | BRCA       | 58.543          | 59.043          | 58.989          | 60.302          | 57.855          | 59.245          |
| TopoSlide     | Vision                     | CPTAC-BRCA      | BRCA       | <b>79.869</b>   | <b>79.869</b>   | <b>82.786</b>   | <b>81.811</b>   | <b>84.547</b>   | <b>83.79</b>    |
| TITAN-V       | Vision                     | TCGA-BRCA       | BRCA       | <u>76.682</u>   | <u>78.93</u>    | <u>79.086</u>   | <u>80.689</u>   | <u>79.856</u>   | <u>81.305</u>   |
| GigaPath      | Vision                     | TCGA-BRCA       | BRCA       | 55.861          | 56.203          | 53.38           | 53.506          | 53.892          | 53.974          |
| TopoSlide     | Vision                     | TCGA-BRCA       | BRCA       | <b>80.381</b>   | <b>80.258</b>   | <b>84.055</b>   | <b>84.263</b>   | <b>84.428</b>   | <b>85.14</b>    |

**CPTAC-LUAD:** TP53 (64 positive, 44 negative), EGFR (39 positive, 69 negative), KRAS (35 positive, 73 negative), KEAP1 (11 positive, 97 negative), and STK11. (18 positive, 90 negative). **TCGA-LUAD:** The distribution of mutation labels across 494 patients is: TP53 (280 positive, 214 negative), EGFR (68 positive, 426 negative), KRAS (160 positive, 334 negative), KEAP1 (102 positive, 392 negative), and STK11 (86 positive, 408 negative).

**BRCA Biomarker Labels Distribution.** We indicate the number of positive and negative cases for each label: **TCGA-BRCA:** ER (810 positive, 238 negative), PR (701 positive, 344 negative), and HER2 (164 positive, 565 negative). **CPTAC-BRCA:** ER (81 positive, 39 negative), PR (68 positive, 47 negative), and HER2 (13 positive, 82 negative).

**BRCA Histologic Subtype Retrieval (IDC vs ILC).** Breast tumors are primarily categorized into major subtypes: invasive ductal carcinoma (IDC) and invasive lobular

carcinoma (ILC) [6]. We evaluate slide-level retrieval on TCGA-BRCA (647 IDC samples, 183 ILC samples). For each query slide, cosine similarity is computed against all other slides, and the predicted subtype is assigned using majority vote over the top  $K$  retrieved neighbors, where  $K$  is in  $\{1, 3, 5\}$ . The results are shown in Tab. C.1 and discussed in the main paper.

**Detailed LUAD Gene Mutation Prediction Results** Tab. C.3, Tab. C.4: TopoSlide demonstrates strong and comparatively stable performance across key gene mutation prediction tasks across cohorts. When evaluated on TCGA-LUAD, TopoSlide achieves the best TP53 (AUROC: 0.702) and remains competitive for EGFR and STK11 (AUROC: 0.663 and 0.654, respectively). When evaluated on CPTAC-LUAD, TopoSlide trained on TCGA-LUAD outperforms all foundation models on TP53 and STK11, reaching AUROCs of 0.601 and 0.793, respectively, and also achieves the strongest KRAS and KEAP1 performance among the LUAD-specific slide models (0.612 and 0.563). In contrast, although TITAN is

Table C.2. Survival prediction performance using 5-fold cross-validation on TCGA-BRCA (DSS). We report mean and standard deviation of the C-index across folds. Best performance in each model category is highlighted in bold, and the second best is underlined. \*\* and \* indicate the overall best and second best, respectively. N/A means no slide encoder trained.

| Model         | Slide Encoder Pre-training |                 |            | TCGA-BRCA                                |
|---------------|----------------------------|-----------------|------------|------------------------------------------|
|               | Modalities                 | Dataset         | Data Scope | DSS                                      |
| CONCH         | Mean Pool                  | N/A             | N/A        | $0.709 \pm 0.071^*$                      |
| Virchow       | Mean Pool                  | N/A             | N/A        | <b><math>0.711 \pm 0.047^{**}</math></b> |
| CTransPath    | Mean Pool                  | N/A             | N/A        | $0.693 \pm 0.073$                        |
| GigaPath-Tile | Mean Pool                  | N/A             | N/A        | $0.685 \pm 0.089$                        |
| TITAN         | VLM                        | Mass 340-K      | 20 organs  | $0.697 \pm 0.094$                        |
| PRISM         | VLM                        | MSKCC, ...      | 17 organs  | $0.613 \pm 0.076$                        |
| CHIEF         | VLM                        | DFCI, TCGA, ... | 19 organs  | $0.673 \pm 0.094$                        |
| GigaPath      | Vision                     | Providence      | 31 organs  | <b><math>0.704 \pm 0.065</math></b>      |
| TITAN-V       | Vision                     | CPTAC-BRCA      | BRCA       | $0.667 \pm 0.073$                        |
| GigaPath      | Vision                     | CPTAC-BRCA      | BRCA       | $0.590 \pm 0.074$                        |
| TopoSlide     | Vision                     | CPTAC-BRCA      | BRCA       | <b><math>0.701 \pm 0.072</math></b>      |
| TITAN-V       | Vision                     | TCGA-BRCA       | BRCA       | $0.681 \pm 0.113$                        |
| GigaPath      | Vision                     | TCGA-BRCA       | BRCA       | $0.566 \pm 0.104$                        |
| TopoSlide     | Vision                     | TCGA-BRCA       | BRCA       | <b><math>0.690 \pm 0.071</math></b>      |

one of the strongest foundation models on TCGA-LUAD, its performance drops on CPTAC-LUAD, and its LUAD-specific vision-only variant, TITAN-V has a near chance performance in several settings ( $\text{AUROC} \in [0.4, 0.5]$  in CPTAC and  $\text{AUROC} \in [0.45, 0.56]$  in TCGA), suggesting weaker cross-cohort generalization.

**Detailed BRCA Biomarker Prediction Results** Tab. C.5, Tab. C.6: TopoSlide outperforms most foundation model baselines across BRCA biomarker prediction tasks. On TCGA-BRCA, it achieves the best ER AUROC (0.735) and remains competitive on PR and HER2 (0.621 and 0.541, respectively), compared to the strongest foundation model results of 0.675 for PR and 0.571 for HER2. On CPTAC-BRCA, TopoSlide remains competitive, with the TCGA-BRCA-trained model achieving the strongest HER2 AUROC among all methods (0.638), while the CPTAC-BRCA-trained model attains 0.599, 0.599, and 0.623 AUROC for ER, PR, and HER2, respectively.

**Survival Prediction on TCGA-BRCA.** We evaluate disease specific survival on TCGA-BRCA using five fold cross validation with a Cox proportional hazards model applied to slide level embeddings. The results are shown in Tab. C.2. TopoSlide(CPTAC) achieves a concordance index of  $0.701 \pm 0.072$ , closely matching the strongest baseline model, GigaPath. It outperforms TITAN, PRISM, and CHIEF. TopoSlide(TCGA) also performs strongly with a concordance index of  $0.690 \pm 0.071$ . For the CPTAC cohort, all but two patients were censored, which makes survival modeling unreliable; therefore, we do not report survival prediction results for CPTAC-BRCA.

## D. Clustering of the Patch Embeddings

TopoSlide learns from the topology of the cluster maps derived from the patch embedding of the Conch model [7]. To confirm that the clusters are biologically meaningful, we asked a board-certified pathologist to annotate sets of patches sampled from the top clusters in the TCGA-LUAD cohort. The patches were selected using two sample approaches:

1. For each cluster, patches were randomly sampled from different slides across the cohort.
2. Within a distinct WSI, patches were sampled from each of the clusters that occupy the largest proportion of the slide.

For the first sampling approach, i.e. cluster patches sampled from different slides, the pathologist was able to assign a label to each cluster that signifies the predominant histologic pattern. Some outliers were noted, as expected. For the second approach, the pathologist was also able to assign labels for the predominant histologic pattern for patches pooled from the same cluster in a WSI. High homogeneity within each cluster was noted, with very few outliers. Sample annotations are in Fig. D.1. The pathologist’s annotations and notes confirmed that the clusters represent different biological features that are important for the model to learn.

Table C.3. Linear probing results for mutation prediction evaluated on the **TCGA-LUAD cohort**. Evaluation with AUROC and balanced accuracy. Best performance in each model category is highlighted in bold, and the second best is underlined. \*\* and \* indicate the overall best and second-best, respectively. N/A means no slide encoder trained.

| Encoder       | Slide Encoder Pre-training |                 |                | TP53                   |                        | EGFR                   |                        | KRAS                   |                        | KEAP1                  |                       | STK11                  |                        |
|---------------|----------------------------|-----------------|----------------|------------------------|------------------------|------------------------|------------------------|------------------------|------------------------|------------------------|-----------------------|------------------------|------------------------|
|               | Modalities                 | Slide Encoder   | Training Scope | AUROC                  | BalAcc                 | AUROC                  | BalAcc                 | AUROC                  | BalAcc                 | AUROC                  | BalAcc                | AUROC                  | BalAcc                 |
| CONCH         | Mean Pool                  | N/A             | N/A            | <b>0.684 ± 0.035</b>   | <b>0.631 ± 0.034</b>   | <b>0.695 ± 0.017*</b>  | <b>0.638 ± 0.022*</b>  | 0.556 ± 0.019          | 0.544 ± 0.018          | 0.565 ± 0.057          | 0.533 ± 0.033         | <b>0.660 ± 0.027*</b>  | <b>0.596 ± 0.019</b>   |
| Virchow       | Mean Pool                  | N/A             | N/A            | 0.633 ± 0.023          | 0.571 ± 0.033          | 0.614 ± 0.009          | 0.546 ± 0.011          | 0.571 ± 0.016          | 0.543 ± 0.012          | 0.538 ± 0.029          | 0.514 ± 0.023         | 0.595 ± 0.027          | 0.538 ± 0.023          |
| CTransPath    | Mean Pool                  | N/A             | N/A            | 0.651 ± 0.020          | 0.598 ± 0.016          | 0.632 ± 0.016          | 0.596 ± 0.012          | <b>0.578 ± 0.019</b>   | <b>0.555 ± 0.014</b>   | 0.561 ± 0.028          | 0.544 ± 0.021         | 0.613 ± 0.014          | 0.558 ± 0.017          |
| GigaPath-File | Mean Pool                  | N/A             | N/A            | 0.624 ± 0.007          | 0.580 ± 0.023          | 0.668 ± 0.016          | 0.584 ± 0.013          | 0.577 ± 0.026          | 0.551 ± 0.026          | <b>0.630 ± 0.025*</b>  | <b>0.584 ± 0.048*</b> | 0.630 ± 0.027          | 0.582 ± 0.017          |
| TITAN         | VLM                        | Mass 340-K      | 20 organs      | <b>0.700 ± 0.015*</b>  | <b>0.652 ± 0.005**</b> | <b>0.720 ± 0.018**</b> | <b>0.646 ± 0.031**</b> | 0.581 ± 0.008          | 0.541 ± 0.010          | 0.477 ± 0.037          | 0.494 ± 0.007         | <b>0.668 ± 0.030**</b> | <b>0.630 ± 0.021**</b> |
| PRISM         | VLM                        | MSKCC, ...      | 17 organs      | 0.683 ± 0.011          | 0.616 ± 0.009          | 0.694 ± 0.018          | 0.631 ± 0.012          | 0.592 ± 0.006*         | 0.561 ± 0.014*         | 0.533 ± 0.011          | 0.514 ± 0.013         | 0.638 ± 0.021          | 0.572 ± 0.034          |
| CHIEF         | VLM                        | DFCI, TCGA, ... | 19 organs      | 0.643 ± 0.013          | 0.588 ± 0.015          | 0.645 ± 0.029          | 0.588 ± 0.017          | 0.565 ± 0.019          | 0.544 ± 0.009          | 0.564 ± 0.013          | 0.554 ± 0.030         | 0.635 ± 0.010          | 0.566 ± 0.010          |
| GigaPath      | Vision                     | Providence      | 31 organs      | 0.621 ± 0.014          | 0.566 ± 0.025          | 0.646 ± 0.013          | 0.593 ± 0.005          | <b>0.599 ± 0.026**</b> | <b>0.572 ± 0.027**</b> | <b>0.632 ± 0.033**</b> | <b>0.572 ± 0.047*</b> | 0.638 ± 0.021          | 0.599 ± 0.022          |
| TITAN-V       | Vision                     | CPTAC-LUAD      | LUAD           | 0.395 ± 0.019          | 0.500 ± 0.000          | 0.507 ± 0.017          | 0.500 ± 0.000          | 0.525 ± 0.007          | 0.500 ± 0.000          | 0.478 ± 0.035          | 0.500 ± 0.000         | 0.538 ± 0.018          | 0.500 ± 0.000          |
| GigaPath      | Vision                     | CPTAC-LUAD      | LUAD           | 0.631 ± 0.021          | 0.590 ± 0.025          | 0.644 ± 0.014          | <b>0.614 ± 0.021</b>   | <b>0.571 ± 0.008</b>   | <b>0.546 ± 0.011</b>   | 0.507 ± 0.024          | 0.501 ± 0.014         | 0.560 ± 0.023          | 0.539 ± 0.018          |
| TopoSlide     | Vision                     | CPTAC-LUAD      | LUAD           | <b>0.690 ± 0.011</b>   | <b>0.634 ± 0.023</b>   | <b>0.690 ± 0.013</b>   | 0.612 ± 0.019          | 0.566 ± 0.014          | 0.543 ± 0.017          | <b>0.525 ± 0.031</b>   | <b>0.508 ± 0.014</b>  | <b>0.632 ± 0.023</b>   | <b>0.544 ± 0.013</b>   |
| TITAN-V       | Vision                     | TCGA-LUAD       | LUAD           | 0.334 ± 0.013          | 0.500 ± 0.000          | 0.403 ± 0.018          | 0.500 ± 0.000          | 0.453 ± 0.007          | 0.500 ± 0.000          | 0.452 ± 0.009          | 0.500 ± 0.000         | 0.446 ± 0.022          | 0.500 ± 0.000          |
| GigaPath      | Vision                     | TCGA-LUAD       | LUAD           | 0.621 ± 0.013          | 0.594 ± 0.012          | 0.614 ± 0.014          | 0.578 ± 0.012          | <b>0.568 ± 0.019</b>   | <b>0.548 ± 0.031</b>   | <b>0.546 ± 0.048</b>   | <b>0.535 ± 0.024</b>  | 0.559 ± 0.015          | 0.544 ± 0.024          |
| TopoSlide     | Vision                     | TCGA-LUAD       | LUAD           | <b>0.702 ± 0.012**</b> | <b>0.651 ± 0.009*</b>  | <b>0.663 ± 0.014</b>   | <b>0.604 ± 0.010</b>   | 0.527 ± 0.018          | 0.520 ± 0.007          | 0.530 ± 0.040          | 0.527 ± 0.022         | <b>0.654 ± 0.011</b>   | <b>0.609 ± 0.009*</b>  |

Table C.4. Linear probing results for mutation prediction tested on the **CPTAC-LUAD cohort**. Evaluation with AUROC and balanced accuracy. Best performance in each model category is highlighted in bold, and the second best is underlined. \*\* and \* indicate the overall best and second-best, respectively. N/A means no slide encoder trained.

| Model      | Slide Encoder Pre-training |                 |            | TP53                   |                        | EGFR                   |                        | KRAS                   |                        | KEAP1                  |                        | STK11                  |                        |
|------------|----------------------------|-----------------|------------|------------------------|------------------------|------------------------|------------------------|------------------------|------------------------|------------------------|------------------------|------------------------|------------------------|
|            | Modalities                 | Dataset         | Data Scope | AUROC                  | BalAcc                 |
| CONCH      | Mean Pool                  | N/A             | N/A        | 0.524 ± 0.022          | 0.505 ± 0.019          | 0.629 ± 0.024          | 0.567 ± 0.025          | <b>0.620 ± 0.012**</b> | <b>0.592 ± 0.006**</b> | 0.547 ± 0.024          | <b>0.534 ± 0.022</b>   | <b>0.678 ± 0.017</b>   | <b>0.625 ± 0.022</b>   |
| Virchow    | Mean Pool                  | N/A             | N/A        | <b>0.571 ± 0.024</b>   | 0.533 ± 0.022          | 0.594 ± 0.025          | 0.537 ± 0.028          | 0.592 ± 0.016          | 0.514 ± 0.027          | <b>0.580 ± 0.056*</b>  | 0.515 ± 0.036          | 0.595 ± 0.069          | 0.533 ± 0.046          |
| CTransPath | Mean Pool                  | N/A             | N/A        | 0.551 ± 0.008          | <b>0.537 ± 0.008</b>   | 0.644 ± 0.024          | 0.604 ± 0.019*         | 0.582 ± 0.025          | 0.559 ± 0.034          | 0.537 ± 0.032          | 0.514 ± 0.016          | 0.653 ± 0.040          | 0.564 ± 0.038          |
| GigaPath   | Mean Pool                  | N/A             | N/A        | 0.503 ± 0.016          | 0.519 ± 0.022          | <b>0.734 ± 0.028**</b> | <b>0.612 ± 0.034**</b> | 0.561 ± 0.034          | 0.534 ± 0.016          | 0.479 ± 0.033          | 0.474 ± 0.029          | 0.619 ± 0.007          | 0.531 ± 0.024          |
| TITAN      | VLM                        | Mass 340-K      | 20 organs  | 0.485 ± 0.030          | 0.501 ± 0.016          | 0.633 ± 0.037          | 0.554 ± 0.029          | 0.527 ± 0.031          | 0.511 ± 0.023          | 0.555 ± 0.036          | 0.537 ± 0.046          | 0.679 ± 0.027          | 0.652 ± 0.027          |
| PRISM      | VLM                        | MSKCC, ...      | 17 organs  | 0.561 ± 0.041          | <b>0.553 ± 0.023</b>   | 0.641 ± 0.018          | <b>0.587 ± 0.014</b>   | <b>0.595 ± 0.015</b>   | <b>0.561 ± 0.006</b>   | <b>0.638 ± 0.042**</b> | 0.551 ± 0.028*         | <b>0.736 ± 0.026*</b>  | <b>0.669 ± 0.014*</b>  |
| CHIEF      | VLM                        | DFCI, TCGA, ... | 19 organs  | 0.575 ± 0.016          | 0.550 ± 0.016          | 0.630 ± 0.010          | <b>0.587 ± 0.013</b>   | 0.545 ± 0.022          | 0.533 ± 0.020          | 0.542 ± 0.017          | <b>0.554 ± 0.024**</b> | 0.668 ± 0.030          | 0.621 ± 0.018          |
| GigaPath   | Vision                     | Providence      | 31 organs  | 0.525 ± 0.016          | 0.531 ± 0.018          | <b>0.702 ± 0.024*</b>  | 0.579 ± 0.029          | 0.532 ± 0.040          | 0.505 ± 0.013          | 0.448 ± 0.042          | 0.473 ± 0.029          | 0.699 ± 0.026          | 0.595 ± 0.017          |
| TITAN-V    | Vision                     | CPTAC-LUAD      | LUAD       | 0.557 ± 0.009          | 0.504 ± 0.008          | 0.563 ± 0.062          | 0.500 ± 0.000          | 0.468 ± 0.014          | 0.494 ± 0.010          | 0.481 ± 0.025          | <b>0.500 ± 0.000</b>   | 0.543 ± 0.066          | 0.500 ± 0.000          |
| GigaPath   | Vision                     | CPTAC-LUAD      | LUAD       | 0.564 ± 0.025          | 0.554 ± 0.026          | <b>0.637 ± 0.039</b>   | <b>0.604 ± 0.024*</b>  | 0.476 ± 0.015          | 0.499 ± 0.016          | <b>0.499 ± 0.034</b>   | 0.485 ± 0.038          | 0.500 ± 0.009          | 0.476 ± 0.014          |
| TopoSlide  | Vision                     | CPTAC-LUAD      | LUAD       | <b>0.588 ± 0.018*</b>  | <b>0.570 ± 0.017**</b> | <b>0.651 ± 0.013</b>   | 0.545 ± 0.016          | <b>0.598 ± 0.024</b>   | <b>0.561 ± 0.030</b>   | 0.478 ± 0.016          | 0.484 ± 0.033          | <b>0.665 ± 0.022</b>   | <b>0.623 ± 0.020</b>   |
| TITAN-V    | Vision                     | TCGA-LUAD       | LUAD       | 0.496 ± 0.015          | 0.500 ± 0.000          | 0.457 ± 0.010          | 0.500 ± 0.000          | 0.453 ± 0.032          | 0.500 ± 0.000          | 0.482 ± 0.016          | 0.501 ± 0.002          | 0.517 ± 0.029          | 0.500 ± 0.000          |
| GigaPath   | Vision                     | TCGA-LUAD       | LUAD       | 0.576 ± 0.029          | 0.551 ± 0.021          | <b>0.636 ± 0.036</b>   | <b>0.587 ± 0.017</b>   | 0.607 ± 0.031          | <b>0.574 ± 0.027*</b>  | 0.453 ± 0.049          | 0.488 ± 0.034          | 0.497 ± 0.040          | 0.457 ± 0.028          |
| TopoSlide  | Vision                     | TCGA-LUAD       | LUAD       | <b>0.601 ± 0.012**</b> | <b>0.569 ± 0.015*</b>  | 0.610 ± 0.010          | 0.564 ± 0.012          | <b>0.612 ± 0.011*</b>  | 0.550 ± 0.020          | <b>0.563 ± 0.037</b>   | <b>0.541 ± 0.039</b>   | <b>0.793 ± 0.024**</b> | <b>0.713 ± 0.025**</b> |

Table C.5. Linear probing results for biomarker prediction evaluated on the **TCGA-BRCA cohort**. Evaluation with AUROC and balanced accuracy. Best performance in each model category is highlighted in bold, and the second best is underlined. \*\* and \* indicate the overall best and second-best, respectively. N/A means no slide encoder trained.

| Model         | Slide Encoder Pre-training |                 |            | ER                     |                        | PR                     |                        | HER2                   |                        |
|---------------|----------------------------|-----------------|------------|------------------------|------------------------|------------------------|------------------------|------------------------|------------------------|
|               | Modalities                 | Dataset         | Data Scope | AUROC                  | BalAcc                 | AUROC                  | BalAcc                 | AUROC                  | BalAcc                 |
| CONCH         | Mean Pool                  | N/A             | N/A        | 0.643 ± 0.056          | 0.581 ± 0.039          | 0.564 ± 0.035          | 0.535 ± 0.024          | 0.530 ± 0.021          | <b>0.524 ± 0.016</b>   |
| Virchow       | Mean Pool                  | N/A             | N/A        | 0.581 ± 0.044          | 0.558 ± 0.033          | 0.559 ± 0.014          | 0.542 ± 0.016          | 0.480 ± 0.021          | 0.493 ± 0.009          |
| CTransPath    | Mean Pool                  | N/A             | N/A        | <b>0.661 ± 0.029</b>   | <b>0.603 ± 0.033*</b>  | <b>0.636 ± 0.022</b>   | <b>0.594 ± 0.009*</b>  | 0.500 ± 0.024          | 0.491 ± 0.017          |
| GigaPath-File | Mean Pool                  | N/A             | N/A        | 0.625 ± 0.023          | 0.585 ± 0.011          | 0.592 ± 0.024          | 0.538 ± 0.016          | <b>0.547 ± 0.016</b>   | 0.509 ± 0.014          |
| TITAN         | VLM                        | Mass 340-K      | 20 organs  | 0.618 ± 0.043          | 0.570 ± 0.020          | 0.617 ± 0.054          | 0.578 ± 0.026          | <b>0.571 ± 0.026**</b> | 0.532 ± 0.015          |
| PRISM         | VLM                        | MSKCC, ...      | 17 organs  | 0.579 ± 0.096          | 0.553 ± 0.064          | 0.601 ± 0.070          | 0.565 ± 0.054          | 0.552 ± 0.023          | 0.500 ± 0.005          |
| CHIEF         | VLM                        | DFCI, TCGA, ... | 19 organs  | <b>0.732 ± 0.021*</b>  | <b>0.659 ± 0.011**</b> | <b>0.675 ± 0.031**</b> | <b>0.625 ± 0.020**</b> | 0.553 ± 0.026          | <b>0.541 ± 0.020*</b>  |
| GigaPath      | Vision                     | Providence      | 31 organs  | 0.645 ± 0.029          | 0.581 ± 0.017          | 0.620 ± 0.011          | 0.521 ± 0.006          | 0.534 ± 0.008          | 0.498 ± 0.009          |
| TITAN-V       | Vision                     | CPTAC-BRCA      | BRCA       | 0.327 ± 0.017          | 0.500 ± 0.000          | 0.352 ± 0.003          | 0.500 ± 0.000          | 0.446 ± 0.017          | 0.500 ± 0.000          |
| GigaPath      | Vision                     | CPTAC-BRCA      | BRCA       | 0.539 ± 0.021          | 0.500 ± 0.006          | 0.499 ± 0.017          | 0.507 ± 0.003          | 0.551 ± 0.027          | 0.506 ± 0.003          |
| TopoSlide     | Vision                     | CPTAC-BRCA      | BRCA       | <b>0.704 ± 0.034</b>   | <b>0.543 ± 0.017</b>   | <b>0.651 ± 0.034*</b>  | <b>0.529 ± 0.006</b>   | <b>0.567 ± 0.025*</b>  | <b>0.548 ± 0.020**</b> |
| TITAN-V       | Vision                     | TCGA-BRCA       | BRCA       | 0.619 ± 0.045          | 0.500 ± 0.000          | 0.603 ± 0.020          | 0.500 ± 0.000          | 0.423 ± 0.010          | 0.500 ± 0.000          |
| GigaPath      | Vision                     | TCGA-BRCA       | BRCA       | 0.675 ± 0.012          | <b>0.587 ± 0.033</b>   | 0.595 ± 0.019          | <b>0.559 ± 0.023</b>   | 0.506 ± 0.505          | 0.488 ± 0.025          |
| TopoSlide     | Vision                     | TCGA-BRCA       | BRCA       | <b>0.735 ± 0.030**</b> | 0.547 ± 0.031          | <b>0.621 ± 0.025</b>   | 0.519 ± 0.008          | <b>0.541 ± 0.030</b>   | <b>0.525 ± 0.018</b>   |

Table C.6. Linear probing results for biomarker prediction evaluated on the **CPTAC-BRCA cohort**. Evaluation with AUROC and balanced accuracy. Best performance in each model category is highlighted in bold, and the second best is underlined. \*\* and \* indicate the overall best and second-best, respectively. N/A means no slide encoder trained.

| Model         | Slide Encoder Pre-training |                 |            | ER                     |                        | PR                     |                        | HER2                   |                        |
|---------------|----------------------------|-----------------|------------|------------------------|------------------------|------------------------|------------------------|------------------------|------------------------|
|               | Modalities                 | Dataset         | Data Scope | AUROC                  | BalAcc                 | AUROC                  | BalAcc                 | AUROC                  | BalAcc                 |
| CONCH         | Mean Pool                  | N/A             | N/A        | 0.606 ± 0.040          | 0.565 ± 0.034          | 0.606 ± 0.021          | 0.547 ± 0.027          | <b>0.580 ± 0.026</b>   | 0.541 ± 0.029          |
| Virchow       | Mean Pool                  | N/A             | N/A        | 0.658 ± 0.023          | 0.554 ± 0.026          | <u>0.661 ± 0.047*</u>  | <b>0.585 ± 0.033</b>   | 0.458 ± 0.062          | 0.474 ± 0.017          |
| CTransPath    | Mean Pool                  | N/A             | N/A        | 0.670 ± 0.018          | <b>0.625 ± 0.014*</b>  | <b>0.672 ± 0.024**</b> | 0.580 ± 0.025          | 0.578 ± 0.028          | <b>0.548 ± 0.038</b>   |
| GigaPath-Tile | Mean Pool                  | N/A             | N/A        | <b>0.675 ± 0.025</b>   | <u>0.584 ± 0.355</u>   | 0.614 ± 0.027          | 0.531 ± 0.011          | 0.485 ± 0.058          | 0.503 ± 0.035          |
| TITAN         | VLM                        | Mass 340-K      | 20 organs  | <u>0.681 ± 0.029*</u>  | 0.606 ± 0.020          | <b>0.655 ± 0.029</b>   | <b>0.608 ± 0.020**</b> | <b>0.600 ± 0.053</b>   | <b>0.568 ± 0.043</b>   |
| PRISM         | VLM                        | MSKCC, ...      | 17 organs  | <b>0.706 ± 0.029**</b> | <b>0.650 ± 0.013**</b> | 0.599 ± 0.055          | 0.559 ± 0.032          | 0.501 ± 0.041          | 0.484 ± 0.036          |
| CHIEF         | VLM                        | DFCI, TCGA, ... | 19 organs  | 0.653 ± 0.004          | <u>0.610 ± 0.015</u>   | <u>0.643 ± 0.022</u>   | <u>0.605 ± 0.027*</u>  | 0.561 ± 0.042          | 0.535 ± 0.037          |
| GigaPath      | Vision                     | Providence      | 31 organs  | 0.585 ± 0.025          | 0.561 ± 0.006          | 0.526 ± 0.015          | 0.519 ± 0.006          | <u>0.595 ± 0.034</u>   | <u>0.563 ± 0.018</u>   |
| TITAN-V       | Vision                     | CPTAC-BRCA      | BRCA       | 0.311 ± 0.009          | 0.500 ± 0.000          | 0.332 ± 0.032          | 0.500 ± 0.000          | 0.419 ± 0.043          | 0.500 ± 0.000          |
| GigaPath      | Vision                     | CPTAC-BRCA      | BRCA       | 0.552 ± 0.080          | <u>0.531 ± 0.037</u>   | 0.450 ± 0.035          | 0.508 ± 0.025          | <u>0.605 ± 0.021</u>   | <u>0.549 ± 0.012</u>   |
| TopoSlide     | Vision                     | CPTAC-BRCA      | BRCA       | <b>0.599 ± 0.010</b>   | <b>0.557 ± 0.006</b>   | <b>0.599 ± 0.009</b>   | <b>0.530 ± 0.003</b>   | <b>0.623 ± 0.025*</b>  | <b>0.572 ± 0.022*</b>  |
| TITAN-V       | Vision                     | TCGA-BRCA       | BRCA       | 0.459 ± 0.020          | 0.500 ± 0.000          | 0.494 ± 0.039          | 0.500 ± 0.000          | <u>0.540 ± 0.022</u>   | 0.500 ± 0.000          |
| GigaPath      | Vision                     | TCGA-BRCA       | BRCA       | <b>0.614 ± 0.004</b>   | <b>0.574 ± 0.016</b>   | <b>0.589 ± 0.013</b>   | <b>0.566 ± 0.010</b>   | 0.486 ± 0.027          | 0.517 ± 0.030          |
| TopoSlide     | Vision                     | TCGA-BRCA       | BRCA       | <u>0.579 ± 0.036</u>   | <u>0.551 ± 0.035</u>   | <u>0.540 ± 0.049</u>   | <u>0.526 ± 0.025</u>   | <b>0.638 ± 0.033**</b> | <b>0.587 ± 0.031**</b> |

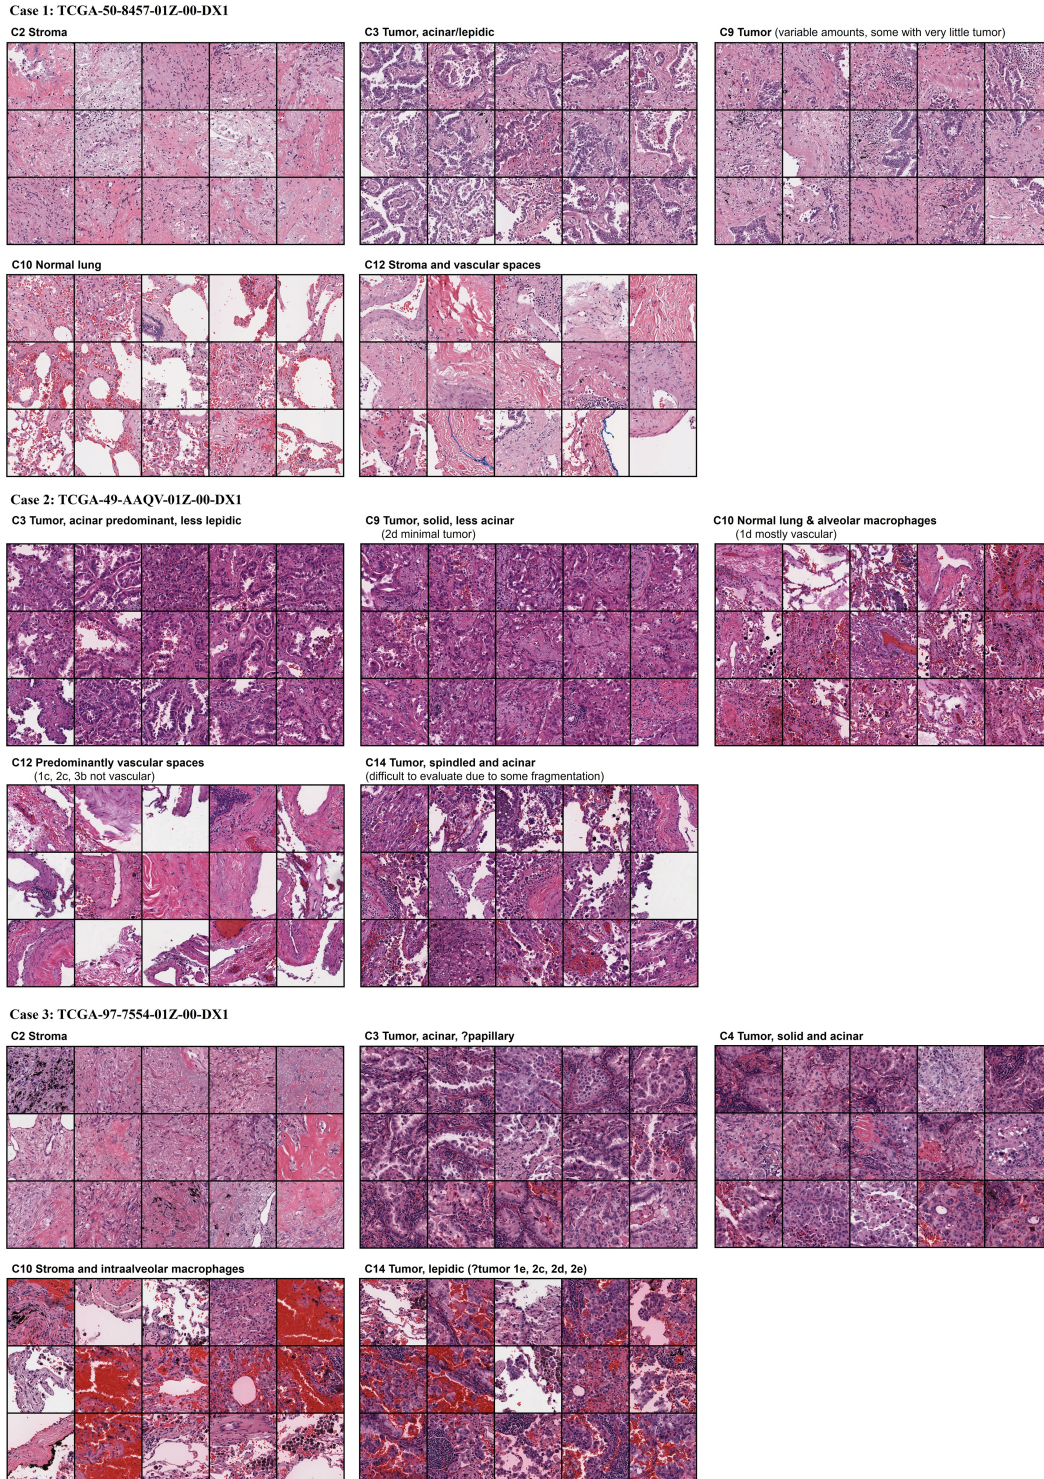

Figure D.1. Case-wise visualization of clusters derived from patch embeddings in the TCGA-LUAD cohort. This figure presents three distinct cases (i.e., Case 1, Case 2, Case 3), each illustrating sample patches from the clusters that occupy the largest proportion of the corresponding slide. Alongside these patches, we include the annotations provided by a board-certified pathologist. Consistent with the previous figure, each WSI and cluster demonstrates a predominant histologic pattern. Notably, the patches in this visualization exhibit greater homogeneity, with reduced noise and fewer outliers compared to earlier analyses [SKP: What is this referring to]. The patches are identified using a grid numbering system, where rows are designated by numeric values and columns by alphabetical letters.

## References

- [1] A. Dosovitskiy, L. Beyer, A. Kolesnikov, D. Weissenborn, X. Zhai, T. Unterthiner, M. Dehghani, M. Minderer, G. Heigold, S. Gelly, J. Uszkoreit, and N. Houlsby, “An image is worth 16x16 words: Transformers for image recognition at scale,” in 9th International Conference on Learning Representations, ICLR, 2021. 1
- [2] R. Wightman, “Pytorch image models (timm).” <https://github.com/rwightman/pytorch-image-models>, 2019. 1
- [3] K. He, H. Fan, Y. Wu, S. Xie, and R. Girshick, “Momentum contrast for unsupervised visual representation learning,” in Proceedings of the IEEE/CVF Conference on Computer Vision and Pattern Recognition (CVPR), pp. 9729–9738, 2020. 1
- [4] I. Loshchilov and F. Hutter, “Decoupled weight decay regularization,” in 7th International Conference on Learning Representations, ICLR, 2019. 1
- [5] J. W. Wei, L. J. Tafe, Y. A. Linnik, L. J. Vaickus, N. Tomita, and S. Hassanpour, “Pathologist-level classification of histologic patterns on resected lung adenocarcinoma slides with deep neural networks,” Scientific reports, vol. 9, no. 1, pp. 1–8, 2019. 1
- [6] R. Barroso-Sousa and O. Metzger-Filho, “Differences between invasive lobular and invasive ductal carcinoma of the breast: Results and therapeutic implications,” Therapeutic Advances in Medical Oncology, vol. 8, no. 4, p. 261, 2016.
- 2
- [7] M. Y. Lu, B. Chen, D. F. Williamson, R. J. Chen, I. Liang, T. Ding, G. Jaume, I. Odintsov, L. P. Le, G. Gerber, A. V. Parwani, A. Zhang, and F. Mahmood, “A visual-language foundation model for computational pathology,” Nature Medicine, vol. 30, no. 3, pp. 863–874, 2024. 3
